# Supplementary material
Source: Springer Nature journal article supplement (https://www.springermedizin.de/resource/supplementary/12916_2012_586_MOESM1_ESM.pdf/9597918)
Supplement: MOESM1 [file 9597918]

| <b>Level of attainment</b>                                      | <b>Goal of an 82 year old woman who met four frailty criteria</b>                                 | <b>Goal of a 74 year old man who met three frailty criteria</b>                                                       |
|-----------------------------------------------------------------|---------------------------------------------------------------------------------------------------|-----------------------------------------------------------------------------------------------------------------------|
| Much better than expected                                       | Able to collect mail from mailbox independently and able to walk three blocks to the post office. | Able to travel to the shopping centre independently on public transport.                                              |
| Somewhat better than expected                                   | Able to collect mail from the mailbox independently, on fine days and on rainy days.              | Able to travel to the shopping centre on public transport in the presence of one other person.*                       |
| Program goal (expected performance at end of intervention)      | Able to collect mail from the mailbox independently, on fine days.*                               | Able to travel to the shopping centre on bus provided by aged care facility. No assistance required.                  |
| Somewhat less than expected (no change in baseline performance) | Able to collect mail from the mailbox with assistance, on fine days. †                            | Able to travel to the shopping centre on bus provided by aged care facility with physical assistance of one person. † |
| Much less than expected                                         | Unable to collect mail from the mailbox.                                                          | Requires private transport and assistance to travel to shopping centre.                                               |

\*12 month score

†baseline score
